# Supplementary material for: Long-term Outcomes of Transcatheter Arterial Chemoembolization Combined With Radiofrequency Ablation as an Initial Treatment for Early-Stage Hepatocellular Carcinoma
Source: PubMed Central journal article supplement (PMC8477266; doi:10.1001/jamanetworkopen.2021.26992), 2021-09-27

## Supplemental Online Content

Zhang YJ, Chen MS, Chen Y, Lau WY, Peng Z. Long-term results of transcatheter arterial chemoembolization combined with radiofrequency ablation as an initial treatment for early-stage hepatocellular carcinoma. *JAMA Netw Open*. 2021;4(9):e2126992. doi:10.1001/jamanetworkopen.2021.26992

**eTable 1.** Baseline Characteristics of the Patients With First Recurrence After Treatment

**eTable 2.** Treatments of First Recurrence

**eTable 3.** Types of Second Recurrence

**eTable 4.** Treatments of Second Recurrence

**eTable 5.** Causes of Death During Follow-up

**eTable 6.** Complications After TACE-RFA and RFA

**eFigure.** Overall Survival Curves for Patients With Recurrence in the Transcatheter Arterial Chemoembolization (TACE) Plus Radiofrequency Ablation (RFA) and RFA Groups

This supplemental material has been provided by the authors to give readers additional information about their work.

**eTable 1.** Baseline characteristics of the patients with first recurrence after treatment.

| Characteristics                  | TACE-RFA(n=80) | RFA(n=87)   | <i>P</i> value |
|----------------------------------|----------------|-------------|----------------|
| Age, Mean (SD), y                | 56.5(12.1)     | 55.4(12.7)  | 0.542          |
| Male/female                      | 66/14          | 67/20       | 0.444          |
| HBsAg (+/-)                      | 75/5           | 80/7        | 0.768          |
| HCV-Ab (+/-)                     | 6/74           | 5/82        | 0.759          |
| AFP, ng/ml                       |                |             | 0.936          |
| <200                             | 37             | 41          |                |
| 200-400                          | 17             | 16          |                |
| >400                             | 26             | 30          |                |
| Tumor number                     |                |             | 0.037          |
| 1                                | 49             | 38          |                |
| 2                                | 20             | 31          |                |
| 3                                | 11             | 18          |                |
| Size of main tumor, Mean (SD),cm | 3.21(1.35)     | 3.02(1.26)  | 0.675          |
| Size range of tumor size, cm     |                |             | 0.742          |
| ≤3                               | 55             | 57          |                |
| >3                               | 25             | 30          |                |
| GGT, Mean (SD), u/L              | 127.3 (96.9)   | 135.1(98.5) | 0.103          |
| AST, Mean (SD),u/L               | 36.0(21.0)     | 34.1(23.2)  | 0.123          |
| ALT, Mean (SD),u/L               | 30.1(24.6)     | 29.8(26.3)  | 0.865          |
| TBIL, Mean (SD),umol/L           | 16.3(9.1)      | 17.2(7.9)   | 0.186          |

|                                                                |           |            |       |
|----------------------------------------------------------------|-----------|------------|-------|
| PLT, Mean (SD),10E <sup>9</sup> /L                             | 135(46)   | 130(21)    | 0.087 |
| PT, Mean (SD), %                                               | 85.2(8.9) | 79.9(11.2) | 0.112 |
| ALB,g/L                                                        |           |            | 0.847 |
| <35                                                            | 15        | 18         |       |
| ≥35                                                            | 65        | 69         |       |
| Child-Pugh class                                               |           |            | 0.856 |
| A                                                              | 60        | 67         |       |
| B                                                              | 20        | 20         |       |
| Ascites (yes/no)                                               | 17/63     | 17/70      | 0.849 |
| Types of first recurrence(Intrahepatic/<br>Extrahepatic/ Both) | 77/3/3    | 81/6/5     | 0.482 |

**eTable 2.** Treatments of first recurrence.

| Treatment of first recurrence | TACE-RFA(n=80) | RFA(n=87) | <i>P</i> value |
|-------------------------------|----------------|-----------|----------------|
| TACE                          | 18             | 40        | 0.002          |
| RFA                           | 52             | 33        | <0.001         |
| Sorafenib                     | 8              | 12        | 0.484          |
| Chemotherapy                  | 2              | 2         | 0.999          |

**eTable 3.** Types of second recurrence.

| Types of second recurrence | TACE-RFA(n=36) | RFA(n=27) |
|----------------------------|----------------|-----------|
| Intrahepatic               | 31             | 23        |
| Extrahepatic               | 5              | 4         |
| Both                       | 5              | 4         |

**eTable 4.** Treatments of second recurrence.

| Treatment of second recurrence | TACE-RFA(n=36) | RFA(n=27) |
|--------------------------------|----------------|-----------|
| TACE                           | 17             | 12        |
| RFA                            | 6              | 4         |
| Sorafenib                      | 9              | 9         |
| Chemotherapy                   | 2              | 1         |
| Radiotherapy                   | 2              | 1         |

**eTable 5.** Causes of death during follow-up.

| Causes of death                   | TACE-RFA(n=94) | RFA(n=95) | <i>P</i> value |
|-----------------------------------|----------------|-----------|----------------|
| Tumor progression                 | 45             | 69        | 0.001          |
| Liver failure with stable disease | 14             | 8         | 0.181          |
| Variceal bleeding                 | 3              | 2         | 0.682          |
| Other                             | 1              | 1         | 0.999          |

Abbreviations: TACE, transcatheter arterial chemoembolization; RFA, radiofrequency ablation.

**eTable 6.** Complications after TACE-RFA and RFA.

| Complications                | TACE-RFA(n=94) | RFA(n=95) |
|------------------------------|----------------|-----------|
| Pain                         | 57             | 51        |
| Grade 1                      | 44             | 42        |
| Grade 2                      | 11             | 8         |
| Grade 3                      | 2              | 1         |
| Fever (temperature > 38.5°C) | 33             | 26        |
| Vomiting                     | 40             | 29        |
| Grade 2                      | 36             | 28        |
| Grade 3                      | 4              | 1         |
| Ascites                      | 5              | 4         |
| Pleural effusion             | 3              | 2         |
| Skin burn                    | 1              | 1         |
| Bile duct stenosis           | 1              | 0         |
| Gastric hemorrhage           | 1              | 0         |
| Abdominal infection          | 0              | 1         |
| Small intestinal obstruction | 0              | 1         |

Abbreviations: TACE, transcatheter arterial chemoembolization; RFA, radiofrequency ablation.



**eFigure.** Overall survival curves for patients with recurrence in the transcatheter arterial chemoembolization (TACE) plus radiofrequency ablation (RFA) and RFA groups.

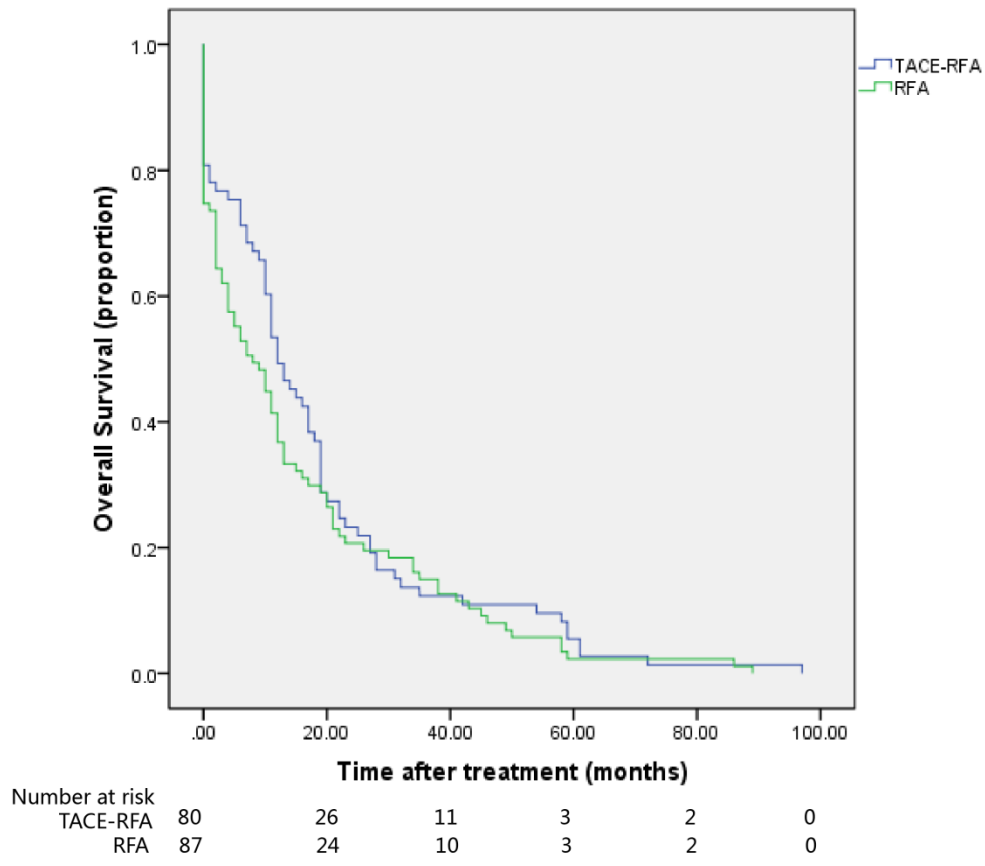

Supplement: jamanetwopen-e2126992-s001.pdf [file jamanetwopen-e2126992-s001.pdf]
